# Supplementary material for: TFE3 regulates whole‐body energy metabolism in cooperation with TFEB
Source: PubMed Central journal article supplement (PMC5412821; doi:10.15252/emmm.201607204), 2017-03-10
Supplement: EMMM-9-605-s001.pdf [file EMMM-9-605-s001.pdf]

# **TFE3 REGULATES WHOLE BODY ENERGY METABOLISM IN COOPERATION WITH TFEB**

Nunzia Pastore<sup>1,2</sup>, Anna Vainshtein<sup>1,2</sup>, Tiemo J. Klisch<sup>1,2</sup>, Andrea Armani<sup>3</sup>, Tuong Huynh<sup>1,2</sup>, Niculin J. Herz<sup>1,2</sup>, Elena V. Polishchuk<sup>4</sup>, Marco Sandri<sup>3,5</sup> and Andrea Ballabio<sup>1,2,4,6</sup>

## **Appendix Table of Content:**

**-Appendix Materials and Methods**

**-Appendix Figures**

**-Appendix Figure legends**

**-Appendix Tables**

## **Appendix Material and Methods**

### **AAV vectors production and injection**

The human *TFE3* coding sequence was cloned into the pAAV-CMV-EGFP plasmid (Tessitore et al, 2008) by replacing the enhanced green fluorescence protein (EGFP) sequence. The AAV vectors were produced and characterized by the Telethon Institute of Genetics and Medicine (TIGEM, Naples, Italy) AAV Vector Core. pAAV2.1-CMV-hTFE3 and pAAV2.1-CMV-EGFP were triple-transfected in subconfluent 293 cells along with pAd-Helper and pack2/1 packaging plasmids as described previously (Xiao et al, 1999). Recombinant vectors were purified by two rounds of CsCl gradient centrifugation, as described previously (Xiao et al, 1999). Vector titers, expressed as genome copies per milliliter (GC/ml), were assessed by both PCR quantification and dot-blot analysis. Mice were intramuscularly (i.m.) injected with a total dose of  $10^{11}$  GC of AAV2.1 vector preparation. Muscles were collected 8 weeks after injection and frozen in liquid nitrogen for subsequent analysis.

### **Protein Carbonyls detection**

Carbonylation of liver proteins was detected by using the OxyBlot Protein Oxidation Detection Kit from Millipore following the manufacturer's instructions.

## Appendix Figure S1

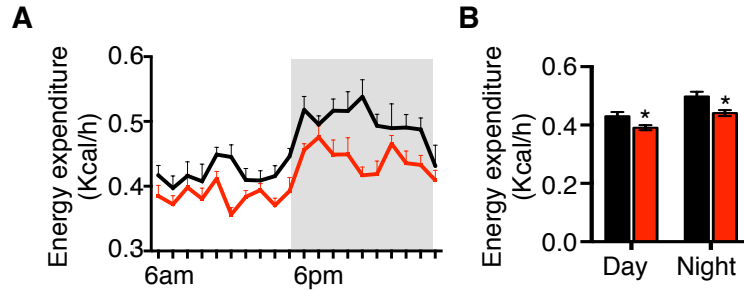

### Appendix Figure S1. TFE3 depletion alters energy expenditure

A Energy expenditure (EE) in WT (black line) ( $n=5$ ) and *Tfe3* KO mice (red line) ( $n=4$ ). Grey areas indicate dark periods (6 PM to 6 AM). Data are presented as mean  $\pm$  SEM.

B Bar graph represents average EE values during day and night ( $n=5$  per group). Data are presented as mean  $\pm$  SEM. Student's two-tailed *t*-test: Day \* $P=0.05$ ; Night \* $P=0.017$ .

## Appendix Figure S2

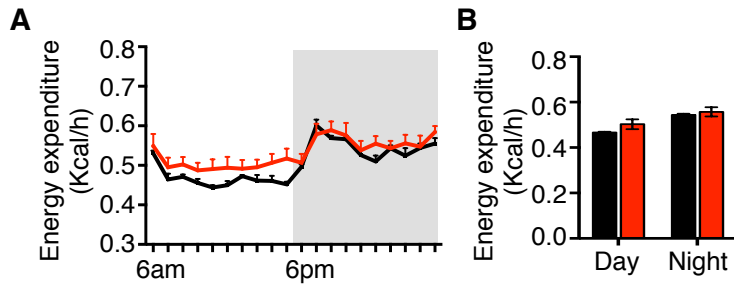

### Appendix Figure S2. Energy expenditure

A Energy expenditure (EE) in WT (black line) and *Tfe3* KO mice (red line) after 1 month of HFD ( $n=5$  per group). Grey areas indicate dark periods (6 PM to 6 AM). Data are presented as mean  $\pm$  SEM.

B Bar graph represents average EE values during day and night ( $n=5$  per group). Data are presented as mean  $\pm$  SEM.

### Appendix Figure S3

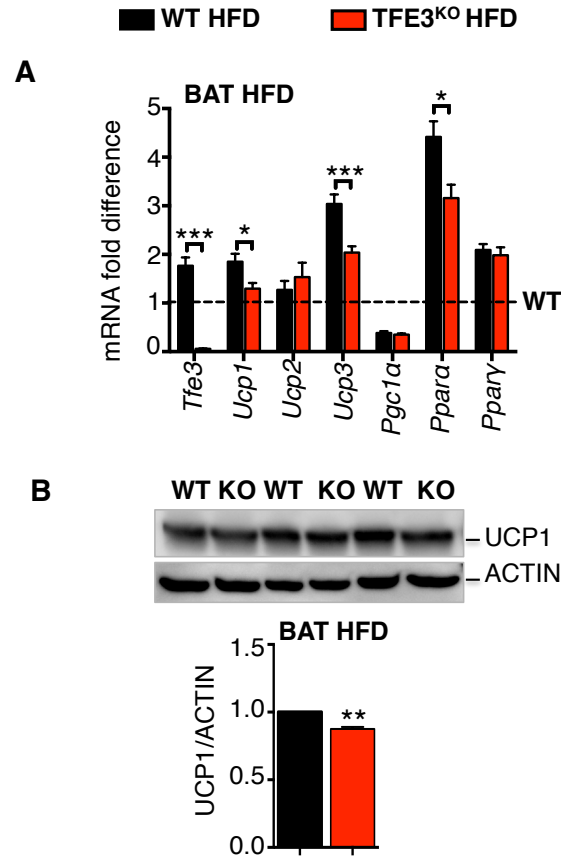

### Appendix Figure S3. TFE3 regulates thermogenesis genes in BAT

A Uncoupling protein (*Ucp*) and  $\beta$ -oxidation gene expression in brown adipose tissues (BAT) from WT and *Tfe3* KO mice fed a HFD for 18 weeks ( $n=10$  per group). Dashed line represents WT mice fed a chow diet. Data are presented as mean  $\pm$  SEM. Student's two-tailed *t*-test: *Tfe3* \*\*\* $P<0.0001$ ; *Ucp1* \* $P=0.0213$ ; *Ucp3* \*\*\* $P=0.0006$ ; *Ppara* \* $P=0.0114$ .

B UCP1 immunoblot and relative quantification from WT and *Tfe3* KO mice fed a HFD for 18 weeks. Data are presented as mean  $\pm$  SEM. Student's two-tailed *t*-test: \*\* $P=0.0011$ .

## Appendix Figure S4

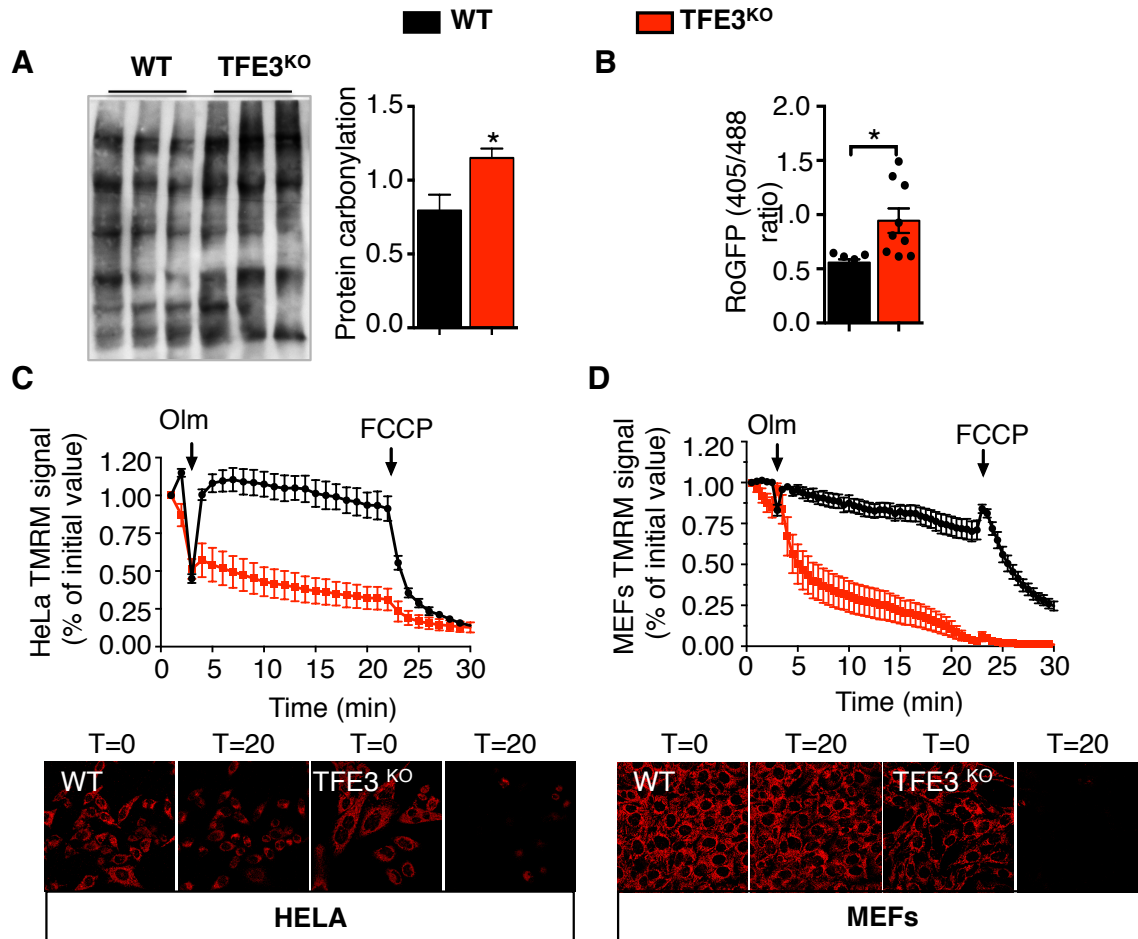

### Appendix Figure S4. TFE3 regulates mitochondrial function

**A** Overall protein carbonylation of WT and *Tfe3* KO livers revealed by Oxyblot. A representative immunoblot for carbonylated proteins is depicted on the left, and densitometric quantification of the carbonylated proteins is represented by the graph on the right. Data are presented as mean  $\pm$  SEM. Student's two-tailed *t*-test: *Tfe3* \*\* $P=0.0462$ .

**B** Quantification of the RoGFP fluorescence intensity 405/488 emission ratio. ROS production was monitored by transfection of the ROS sensor Matrix-roGFP plasmid in WT ( $n=7$ ) and *Tfe3* KO ( $n=9$ ) MEFs. Data are presented as mean  $\pm$  SEM. Student's two-tailed *t*-test: \* $P=0.0110$ .

C-D Mitochondrial membrane potential of WT ( $n=4$ ) and *Tfe3* KO ( $n=7$ ) HeLa (C), and WT ( $n=5$ ) and *Tfe3* KO ( $n=8$ ) MEFs (D) and representative images of TMRM signal. Where indicated, oligomycin (olm) or protonophore carbonylcyanide-p-trifluoromethoxyphenyl hydrazone (FCCP) were added. Data are presented as mean  $\pm$  SEM.

**Appendix Table S1. Metabolic parameters of 2-months-old WT and *Tfe3* KO mice 24h after fasting.** ALT, AST, CPK and LDH values are reported in U/L along with the relative *p* value calculated by Student's two-tailed *t*-test.

|               |                | <b>ALT</b> | <b>AST</b> | <b>CPK</b>    | <b>LDH</b>   |
|---------------|----------------|------------|------------|---------------|--------------|
| <b>Fed</b>    | WT             | 45±13.4    | 67.75±14.6 | 273±110.7     | 280±92.7     |
|               | KO             | 21.75±1.8  | 60.5±9.6   | 418±122.6     | 253.75±51.8  |
|               | <i>p value</i> | 0.138      | 0.69       | 0.44          | 0.81         |
| <b>Fasted</b> | WT             | 25.5±4.3   | 55.5±11.06 | 203.25±59.8   | 176.75±32.1  |
|               | KO             | 86.5±49.4  | 154±85.6   | 1693.3±958.17 | 402.25±85.19 |
|               | <i>p value</i> | 0.05       | 0.067      | 0.024         | 0.048        |



**Appendix Table S2. Gene ontology analysis of the 136 mitochondria-related genes identified as TFE3 targets (Betschinger et al, 2013) (*p* 2,38\*E-23).**

| <b>Biological Processes in which the TFE3_Mitochondrial Targets are enriched:</b> | <b>N GENES</b> | <b>SYMBOLS</b>                                                                                                                                                |
|-----------------------------------------------------------------------------------|----------------|---------------------------------------------------------------------------------------------------------------------------------------------------------------|
| GO:0000266~mitochondrial fission                                                  | 3              | FIS1, BAX, MUL1                                                                                                                                               |
| GO:0000302~response to reactive oxygen species                                    | 6              | GPX4, BCL2, TXNRD2, PRDX5, SOD2, GLRX2                                                                                                                        |
| GO:0001666~response to hypoxia                                                    | 4              | LONP1, BCL2, ABAT, SOD2                                                                                                                                       |
| GO:0001836~release of cytochrome c from mitochondria                              | 6              | BID, BAK1, BBC3, BCL2, BAX, SOD2                                                                                                                              |
| GO:0006006~glucose metabolic process                                              | 5              | PDK1, PDK4, PCK2, OGDH, CPT1A                                                                                                                                 |
| GO:0006066~alcohol metabolic process                                              | 6              | PDK1, CPT1B, PDK4, PCK2, OGDH, CPT1A                                                                                                                          |
| GO:0006084~acetyl-CoA metabolic process                                           | 6              | NNT, ACO2, SUCLG1, CS, IDH2, SUCLA2                                                                                                                           |
| GO:0006119~oxidative phosphorylation                                              | 11             | ATP5D, NDUFS4, NDUFB6, NDUFV1, NDUFS8, ATP5F1, ATP5O, ATP5G1, ATP5A1, ATP5G3, UQCRB                                                                           |
| GO:0006120~mitochondrial electron transport, NADH to ubiquinone                   | 4              | NDUFS4, NDUFB6, NDUFV1, NDUFS8                                                                                                                                |
| GO:0006139~nucleobase, nucleoside, nucleotide and nucleic acid metabolic process  | 23             | ATP5D, PHB, CYCS, AK3, ATP5F1, ESR2, ATP5G1, ATP5G3, SOD2, GLRX2, MTHFD1, LONP1, SLC25A13, BAX, MARS2, TFB2M, ATP5O, ATP5A1, POLG2, FPGS, DNAJA3, LRPPRC, DUT |
| GO:0006200~ATP catabolic process                                                  | 4              | ATP5D, LONP1, ATP5O, ATP5A1                                                                                                                                   |
| GO:0006626~protein targeting to mitochondrion                                     | 9              | BID, GRPEL1, TIMM17A, TIMM9, TIMM10, TIMM13, MIPEP, TIMM44, TOMM34                                                                                            |
| GO:0006635~fatty acid beta-oxidation                                              | 6              | CPT1B, ACADS, ECHS1, BDH2, DECR1, CPT1A                                                                                                                       |
| GO:0006732~coenzyme metabolic process                                             | 14             | ACO2, SUCLG1, CS, NFS1, COQ7, SOD2, GLRX2, COQ4, MTHFD1, NNT, GPX4, IDH2, FPGS, SUCLA2                                                                        |
| GO:0006754~ATP biosynthetic process                                               | 8              | ATP5D, SLC25A13, ATP5F1, AK3, ATP5O, ATP5G1, ATP5A1, ATP5G3                                                                                                   |
| GO:0006800~oxygen and reactive oxygen species metabolic process                   | 6              | NDUFS4, GPX4, BCL2, NDUFA13, MPV17, SOD2                                                                                                                      |

|                                                             |    |                                                                                                                                                                       |
|-------------------------------------------------------------|----|-----------------------------------------------------------------------------------------------------------------------------------------------------------------------|
| GO:0006811~ion transport                                    | 16 | ATP5D, CPT1B, ATP5F1, ATP5G1, VDAC2, ATP5G3, VDAC1, SLC25A12, NNT, SLC25A13, PSEN1, SLC25A22, ATP5O, SLC25A1, ATP5A1, SCO2                                            |
| GO:0006818~hydrogen transport                               | 7  | ATP5D, NNT, ATP5F1, ATP5O, ATP5G1, ATP5A1, ATP5G3                                                                                                                     |
| GO:0006820~anion transport                                  | 7  | SLC25A12, SLC25A13, PSEN1, SLC25A22, SLC25A1, VDAC2, VDAC1                                                                                                            |
| GO:0006839~mitochondrial transport                          | 21 | ATP5D, BID, CPT1B, GRPEL1, TIMM17A, TIMM10, TIMM13, MIPEP, TIMM44, SLC25A12, BAK1, SLC25A13, PSEN1, BAX, BCL2, TIMM9, SLC25A27, ATP5O, SLC25A1, SLC25A15, TOMM34      |
| GO:0006865~amino acid transport                             | 7  | SLC25A12, CPT1B, CLN3, SLC25A13, PSEN1, SLC25A22, SLC25A15                                                                                                            |
| GO:0006874~cellular calcium ion homeostasis                 | 5  | BAK1, CLN3, PSEN1, BCL2, BAX                                                                                                                                          |
| GO:0006886~intracellular protein transport                  | 12 | BID, GRPEL1, TIMM17A, TIMM9, TRAK1, TIMM10, NDUFA13, TIMM13, MIPEP, TIMM44, HSPA9, TOMM34                                                                             |
| GO:0006979~response to oxidative stress                     | 9  | LONP1, PSEN1, GPX4, BCL2, NDUFS8, TXNRD2, PRDX5, SOD2, GLRX2                                                                                                          |
| GO:0007005~mitochondrion organization                       | 24 | BID, SPG7, GRPEL1, MSTO1, TIMM17A, TIMM10, MPV17, MUL1, TIMM13, MIPEP, TIMM44, SOD2, BAK1, FIS1, LONP1, NDUFS4, BBC3, BAX, BCL2, TIMM9, NDUFS8, TFB2M, DNAJA3, TOMM34 |
| GO:0007006~mitochondrial membrane organization              | 7  | BID, BAK1, BCL2, BAX, TIMM9, TIMM10, TIMM13                                                                                                                           |
| GO:0007007~inner mitochondrial membrane organization        | 3  | TIMM9, TIMM10, TIMM13                                                                                                                                                 |
| GO:0007584~response to nutrient                             | 3  | BCKDHA, BCL2, BCKDHB                                                                                                                                                  |
| GO:0008635~activation of caspase activity by cytochrome c   | 3  | BAK1, BAX, CYCS                                                                                                                                                       |
| GO:0008637~apoptotic mitochondrial changes                  | 6  | BID, BAK1, BBC3, BCL2, BAX, SOD2                                                                                                                                      |
| GO:0009060~aerobic respiration                              | 8  | NNT, ACO2, SUCLG1, CS, IDH2, SUCLA2, SURF1, UQCRB                                                                                                                     |
| GO:0010035~response to inorganic substance                  | 11 | SLC25A12, ATP5D, D2HGDH, SLC25A13, GPX4, BCL2, ABAT, TXNRD2, PRDX5, SOD2, GLRX2                                                                                       |
| GO:0010522~regulation of calcium ion transport into cytosol | 3  | BAK1, BCL2, BAX                                                                                                                                                       |
| GO:0015711~organic anion transport                          | 5  | SLC25A12, SLC25A13, PSEN1, SLC25A22, SLC25A1                                                                                                                          |
| GO:0015800~acidic amino acid                                | 4  | SLC25A12, SLC25A13, PSEN1, SLC25A22                                                                                                                                   |

|                                                                           |    |                                                                                                                                                                                                  |
|---------------------------------------------------------------------------|----|--------------------------------------------------------------------------------------------------------------------------------------------------------------------------------------------------|
| transport                                                                 |    |                                                                                                                                                                                                  |
| GO:0015849~organic acid transport                                         | 8  | SLC25A12, CPT1B, CLN3, SLC25A13, PSEN1, SLC25A22, SLC25A1, SLC25A15                                                                                                                              |
| GO:0015985~energy coupled proton transport, down electrochemical gradient | 6  | ATP5D, ATP5F1, ATP5O, ATP5G1, ATP5A1, ATP5G3                                                                                                                                                     |
| GO:0015986~ATP synthesis coupled proton transport                         | 6  | ATP5D, ATP5F1, ATP5O, ATP5G1, ATP5A1, ATP5G3                                                                                                                                                     |
| GO:0022900~electron transport chain                                       | 12 | SLC25A12, NDUFS4, SLC25A13, NDUFB6, NDUFV1, NDUFS8, CYCS, CYC1, NDUFA13, UQCRB, SOD2, GLRX2                                                                                                      |
| GO:0022904~respiratory electron transport chain                           | 8  | SLC25A12, NDUFS4, SLC25A13, NDUFB6, NDUFV1, NDUFS8, UQCRB, SOD2                                                                                                                                  |
| GO:0031667~response to nutrient levels                                    | 7  | BCKDHA, CLN3, PSEN1, ACADS, BCL2, BCKDHB, SOD2                                                                                                                                                   |
| GO:0032469~endoplasmic reticulum calcium ion homeostasis                  | 4  | BAK1, PSEN1, BCL2, BAX                                                                                                                                                                           |
| GO:0034440~lipid oxidation                                                | 6  | CPT1B, ACADS, ECHS1, BDH2, DECR1, CPT1A                                                                                                                                                          |
| GO:0034614~cellular response to reactive oxygen species                   | 3  | GPX4, PRDX5, SOD2                                                                                                                                                                                |
| GO:0042391~regulation of membrane potential                               | 6  | BAK1, CLN3, PSEN1, BCL2, BAX, SOD2                                                                                                                                                               |
| GO:0042594~response to starvation                                         | 3  | CLN3, PSEN1, ACADS                                                                                                                                                                               |
| GO:0042773~ATP synthesis coupled electron transport                       | 5  | NDUFS4, NDUFB6, NDUFV1, NDUFS8, UQCRB                                                                                                                                                            |
| GO:0042775~mitochondrial ATP synthesis coupled electron transport         | 5  | NDUFS4, NDUFB6, NDUFV1, NDUFS8, UQCRB                                                                                                                                                            |
| GO:0043436~oxoacid metabolic process                                      | 28 | BCAT2, PTGES2, NFS1, ECHS1, MTHFD1, GLS2, CKMT2, IDH2, MARS2, ALDH4A1, BDH2, POLG2, SUCLA2, HADH, BCKDHA, CPT1B, CLN3, ACO2, ACADS, SUCLG1, MCAT, CS, BCKDHB, DECR1, PCK2, CPT1A, FPGS, SLC25A15 |
| GO:0044248~cellular catabolic process                                     | 28 | ATP5D, BCAT2, ECHS1, MTHFD1, LONP1, GPX4, IDH2, ALDH4A1, BDH2, ATP5O, SUCLA2, BCKDHA, CPT1B, CLN3, ACO2, ACADS, SUCLG1, CYCS, CS, BCKDHB, MUL1, DECR1, CPT1A, NNT, PSEN1, BAX, ABAT, ATP5A1      |
| GO:0044260~cellular macromolecule metabolic process                       | 38 | TUFM, MRPL42, D2HGDH, GRPEL1, MRPL41, MRPS12, NFS1, MIPEP, HSCB, GLRX2, LONP1, BCL2, TRAK1, MARS2,                                                                                               |

|                                                              |    |                                                                                                                                                                 |
|--------------------------------------------------------------|----|-----------------------------------------------------------------------------------------------------------------------------------------------------------------|
|                                                              |    | TFB2M, POLG2, DNAJA3, HSPA9, PDK1, CLN3, MRPL51, PHB, PDK4, CYCS, RAF1, MUL1, MRPS21, ESR2, MSRB3, SOD2, MRPL23, MRPS18C, PSEN1, L2HGDH, TSFM, BAX, LRPPRC, DUT |
| GO:0044262~cellular carbohydrate metabolic process           | 9  | PDK1, PSEN1, PDK4, TRAK1, CS, IDH2, PCK2, OGDH, CPT1A                                                                                                           |
| GO:0044271~nitrogen compound biosynthetic process            | 15 | ATP5D, BCAT2, AK3, NFS1, ATP5F1, ATP5G1, ATP5G3, MTHFD1, SLC25A13, ALDH4A1, ATP5O, ATP5A1, FPGS, SUCLA2, SLC25A15                                               |
| GO:0045039~protein import into mitochondrial inner membrane  | 3  | TIMM9, TIMM10, TIMM13                                                                                                                                           |
| GO:0046034~ATP metabolic process                             | 9  | ATP5D, LONP1, SLC25A13, ATP5F1, AK3, ATP5O, ATP5G1, ATP5A1, ATP5G3                                                                                              |
| GO:0046902~regulation of mitochondrial membrane permeability | 4  | BID, BAK1, BCL2, BAX                                                                                                                                            |
| GO:0046942~carboxylic acid transport                         | 8  | SLC25A12, CPT1B, CLN3, SLC25A13, PSEN1, SLC25A22, SLC25A1, SLC25A15                                                                                             |
| GO:0048545~response to steroid hormone stimulus              | 6  | BCKDHA, ACADS, GPX4, BCL2, BCKDHB, ESR2                                                                                                                         |
| GO:0051171~regulation of nitrogen compound metabolic process | 12 | BCKDHA, PTGES2, PHB, TRAK1, NDUFA13, TFB2M, ATP1F1, ESR2, DNAJA3, LRPPRC, SOD2, GLRX2                                                                           |
| GO:0051345~positive regulation of hydrolase activity         | 6  | BAK1, BBC3, BAX, CYCS, MUL1, DNAJA3                                                                                                                             |
| GO:0051881~regulation of mitochondrial membrane potential    | 4  | BAK1, BCL2, BAX, SOD2                                                                                                                                           |
| GO:0070584~mitochondrion morphogenesis                       | 4  | BAK1, FIS1, BAX, MUL1                                                                                                                                           |
| GO:0070585~protein localization in mitochondrion             | 9  | BID, GRPEL1, TIMM17A, TIMM9, TIMM10, TIMM13, MIPEP, TIMM44, TOMM34                                                                                              |

**Appendix Table S3. Metabolic parameters in WT and *Tfe3* KO mice fed a HFD for 18 weeks.** ALT, AST, ALP, CPK, LDH and glucose values are reported in U/L along with the relative *p* value calculated by Student's two-tailed *t*-test.

|                                        | <b>ALT</b>  | <b>AST</b>   | <b>ALP</b>  | <b>CPK</b>  | <b>LDH</b>   | <b>Glucose</b> |
|----------------------------------------|-------------|--------------|-------------|-------------|--------------|----------------|
| <b>WT</b>                              | 318±89.8    | 259.5±76.6   | 126±19.5    | 375.75±76.4 | 611.25±119.8 | 284.33±25.5    |
| <b>KO</b>                              | 563.3±124.4 | 686.33±187.6 | 299.5±64.8  | 215.5±62.2  | 3289±1334.7  | 171±21.2       |
| <b><i>p</i> value</b>                  | 0.186       | 0.089        | 0.042       | 0.155       | 0.094        | 0.0417         |
| <b>WT<br/>HDAd-<br/>TFE3<br/>early</b> | 99.75±26.7  | 127.75±18.9  | 70.75±18.9  | 556.5±174.6 | 373.75±76.8  | 262.5±23.1     |
| <b><i>p</i> value</b>                  | 0.058       | 0.146        | 0.0443      | 0.3796      | 0.146        | 0.898          |
| <b>WT<br/>HDAd-<br/>TFE3<br/>Late</b>  | 96±30.3     | 139.7±27     | 118.75±17.0 | 259.25±98.7 | 365.3±54.8   | 212.25±21.7    |
| <b><i>p</i> value</b>                  | 0.100       | 0.260        | 0.789       | 0.387       | 0.165        | 0.313          |

**Appendix Table S4. Primers used for qPCR analysis**

| <b>Gene</b>    |         | <b>Sequences (5'→3')</b> |
|----------------|---------|--------------------------|
| <i>Tfe3</i>    | forward | AGGATCAAAGAGCTGGGCAC     |
|                | reverse | CCGGCTCTCCAGGTCTTTG      |
| <i>Pepck</i>   | forward | GGCGATGACATTGCCTGGATGA   |
|                | reverse | TGTCTTCACTGAGGTGCCAGGA   |
| <i>G6Pc</i>    | forward | TGGTAGCCCTGTCTTTCTTTG    |
|                | reverse | TTCCAGCATTCACTTTTCCT     |
| <i>Gsk3</i>    | forward | TGGCAGCAAGGTAACCACAG     |
|                | reverse | CGGTTCTTAAATCGCTTGTCTTG  |
| <i>Opal</i>    | forward | ATACTGGGATCTGCTGTTGG     |
|                | reverse | AAGTCAGGCACAATCCACTT     |
| <i>Drp1</i>    | forward | TCAGATCGTCGTAGTGGGAA     |
|                | reverse | TCTTCTGGTGAAACGTGGAC     |
| <i>Fis1</i>    | forward | AAGTATGTGCGAGGGCTGT      |
|                | reverse | TGCCTACCAGTCCATCTTTC     |
| <i>Mfn1</i>    | forward | CCTACTGCTCCTTCTAACCCA    |
|                | reverse | AGGGACGCCAATCCTGTGA      |
| <i>Mfn2</i>    | forward | ATGTTACCACGGAGCTGGAC     |
|                | reverse | AACTGCTTCTCCGTCTGCAT     |
| <i>Cd36</i>    | forward | GGACATTGAGATTCTTTTCCTCTG |
|                | reverse | GCAAAGGCATTGGCTGGAAGAAC  |
| <i>Cpt1a</i>   | forward | GGCATAAACGCAGAGCATTCCCTG |
|                | reverse | CAGTGTCCATCCTCTGAGTAGC   |
| <i>Cyp7a1</i>  | forward | CACCATTCCCTGCAACCTTCTGG  |
|                | reverse | ATGGCATTCCCTCCAGAGCTGA   |
| <i>Fgf21</i>   | forward | ATCAGGGAGGATGGAACAGTGG   |
|                | reverse | AGCTCCATCTGGCTGTTGGCAA   |
| <i>Pgcl1</i>   | forward | GAATCAAGCCACTACAGACACCG  |
|                | reverse | CATCCCTCTTGAGCCTTTCGTG   |
| <i>ApoA4</i>   | forward | CAGAAGACGGATGTCACTCAGC   |
|                | reverse | AGCTGTACGACAAAGGGCACCA   |
| <i>Cyp17a1</i> | forward | AGCTCTGTGCTGAACTGGATCC   |
|                | reverse | AGACGGTGTTCGACTGAAGCCT   |
| <i>Cyp4a10</i> | forward | GCTACTCAAGGCTTTCAGCAG    |
|                | reverse | CCAGAACCATCTAGGAAAGGCAC  |
| <i>Cyp4a14</i> | forward | CAGCTACCAAGGCAGTGTTCAG   |
|                | reverse | GGACAAACGTCCATCAGAGGAC   |
| <i>Fasn</i>    | forward | AGAAGCCATGTGGGGAAGATT    |
|                | reverse | AGCAGGGACAGGACAAGACAA    |
| <i>Srebp1c</i> | forward | AGCTGTCGGGGTAGCGTCTG     |
|                | reverse | GAGAGTTGGCACCTGGGCTG     |
| <i>Ucp1</i>    | forward | CAAAAACAGAAGGATTGCCGAAA  |
|                | reverse | TCTTGGACTGAGTCGTAGAGG    |

|                                |         |                           |
|--------------------------------|---------|---------------------------|
| <i>Ucp2</i>                    | forward | ATGGTTGGTTTCAAGGCCACA     |
|                                | reverse | TTGGCGGTATCCAGAGGGAA      |
| <i>Ucp3</i>                    | forward | GTGCTGAGATGGTGACCTACG     |
|                                | reverse | GCGTTCATGTATCGGGTCTTTA    |
| <i>Ppara</i>                   | forward | ACCACTACGGAGTTCACGCATG    |
|                                | reverse | ACCACTACGGAGTTCACGCATG    |
| <i>Ppar<math>\gamma</math></i> | forward | GTA CTGTCGGTTTCAGAAAGTGCC |
|                                | reverse | ATCTCCGCCAACAGCTTCTCCT    |
| <i>Acot1</i>                   | forward | ACTACGATGACCTCCCCAAG      |
|                                | reverse | CATAGCAAGGCCAAGTTCAC      |
| <i>Gapdh</i>                   | forward | AACACTGAGCATCTCCCTCA      |
|                                | reverse | GTGGGTGCAGCGAACTTTAT      |
| <i>S16</i>                     | forward | AGGAGCGATTTGCTGGTGTGG     |
|                                | reverse | GCTACCAGGGCCTTTGAGATG     |

**Appendix Table S5. Primary antibodies used for immunoblots and staining.**

| <b>Antigen</b> | <b>Species in which the Ab was raised</b> | <b>Dilution</b> | <b>Source</b>       |
|----------------|-------------------------------------------|-----------------|---------------------|
| TFE3           | Rabbit                                    | 1:1000          | Sigma Aldrich       |
| TFEB           | Rabbit                                    | 1:1000          | Bethyl Laboratories |
| H3             | Rabbit                                    | 1:3000          | Cell Signaling      |
| OXPPOS         | Mouse                                     | 1:3000          | Invitrogen          |
| TOM20          | Rabbit                                    | 1:250           | Santa Cruz          |
| GAPDH          | Mouse                                     | 1:1000          | Santa Cruz          |
| ACTIN          | Mouse                                     | 1:1000          | Novus Biological    |
| DYSTROPHIN     | Mouse                                     | 1:1000          | Novocastra          |
| UCP1           | Rabbit                                    | 1:5000          | Abcam               |
