# Supplementary material for: TFE3 regulates whole‐body energy metabolism in cooperation with TFEB
Source: PubMed Central journal article supplement (PMC5412821; doi:10.15252/emmm.201607204), 2017-03-10
Supplement: EMMM-9-605-s002.pdf [file EMMM-9-605-s002.pdf]

## Expanded View Figures

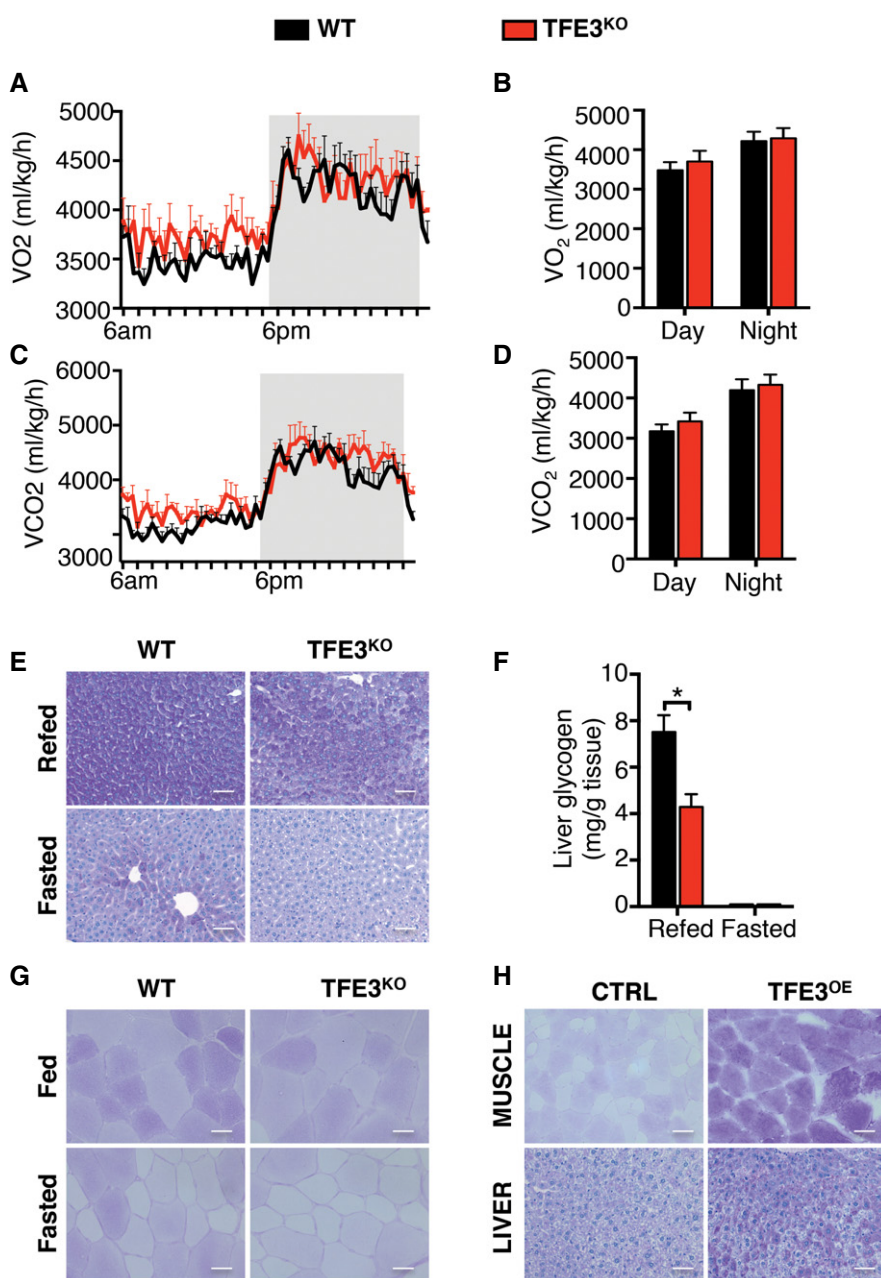

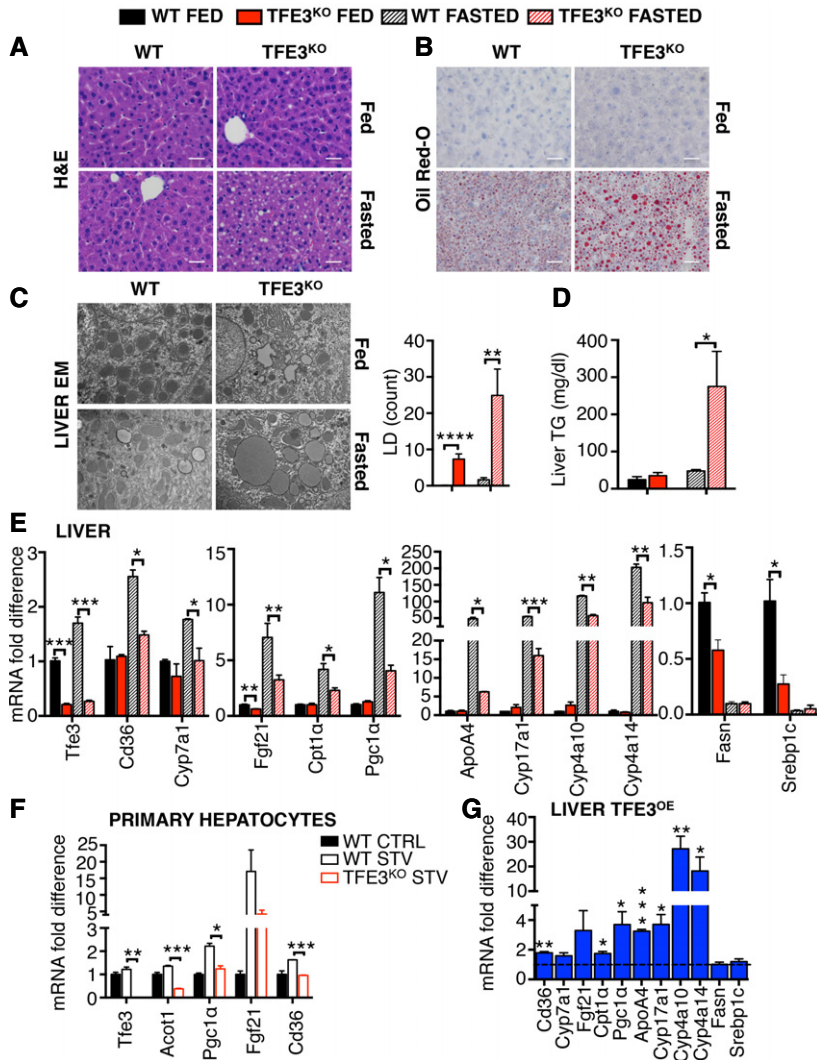

**Figure EV2. TFE3 regulates  $\beta$ -oxidation during starvation.**

A–D Haematoxylin and eosin (H&E) staining (A), Oil Red O (B) and electron microscopy images (C) with the relative quantification of the lipid droplets and liver triglyceride (TG) levels (D) of livers isolated from fed and 24-h-fasted *Tfe3* KO and control mice ( $n = 5$  per group) (scale bars H&E: 20  $\mu$ m; scale bars Oil Red O: 50  $\mu$ m). Data are presented as mean  $\pm$  SEM. Student's two-tailed *t*-test: \*\*\*\* $P < 0.0001$ ; \*\* $P = 0.0041$ ; \* $P = 0.0288$ .

E Quantification of mRNA levels of genes involved in lipid metabolism in livers from WT and *Tfe3* KO mice treated as indicated ( $n = 3$  per group). Data are presented as mean  $\pm$  SEM. Student's two-tailed *t*-test: *Tfe3* \*\*\*\* $P < 0.001$ ; *Cd36* \* $P = 0.0162$ ; *Cyp7a1* \* $P = 0.05$ ; *Fgf21* \*\* $P = 0.0011$ ; *Cpt1a* \* $P = 0.0307$ ; *Pgc1a* \* $P = 0.0147$ ; *ApoA4* \* $P = 0.0147$ ; *Cyp17a1* \*\*\*\* $P = 0.0005$ ; *Cyp4a10* \*\* $P = 0.0056$ ; *Cyp4a14* \*\* $P = 0.0048$ ; *Fasn* \*\* $P = 0.0275$ ; *Srebp1c* \* $P = 0.0255$ .

F Quantification of mRNA levels of genes involved in lipid metabolism in primary hepatocytes from WT and *Tfe3* KO mice treated as indicated. Data are presented as mean  $\pm$  SEM. Student's two-tailed *t*-test: *Tfe3* \*\* $P < 0.003$ ; *Acot1* \*\*\* $P = 0.0007$ ; *Pgc1a* \* $P = 0.0159$ ; *Cd36* \*\*\* $P = 0.0002$ .

G Expression of genes involved in lipid metabolism in livers from HDAd-PEPCK-*TFE3* injected mice ( $n = 3$  per group). Values were normalized to control livers (dashed line). Data are presented as mean  $\pm$  SEM. Student's two-tailed *t*-test: *Cd36* \*\* $P = 0.0018$ ; *Cpt1a* \* $P = 0.0449$ ; *Pgc1a* \* $P = 0.0207$ ; *ApoA4* \*\*\* $P = 0.0004$ ; *Cyp17a1* \* $P = 0.0162$ ; *Cyp4a10* \*\* $P = 0.0067$ ; *Cyp4a14* \* $P = 0.0480$ .

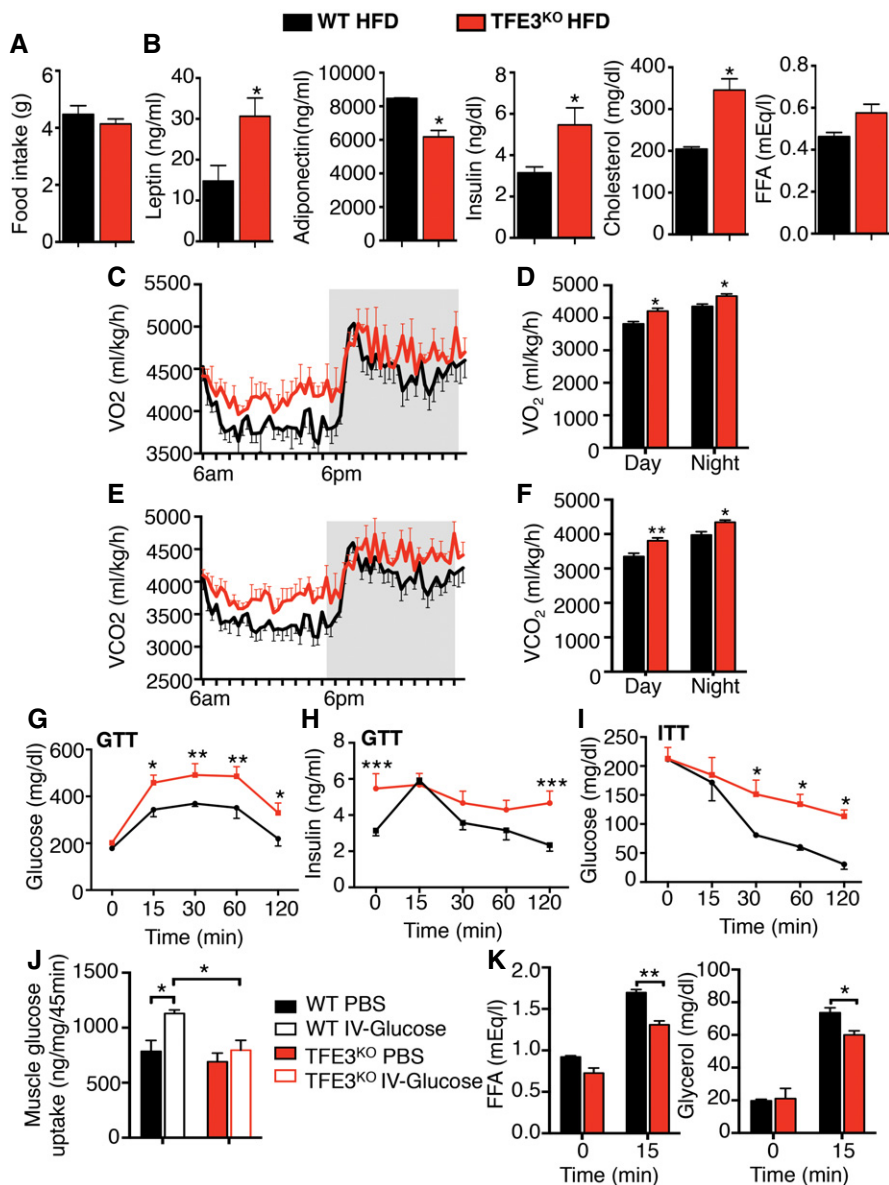

**Figure EV3. Metabolic profile of *Tfe3* KO mice fed a HFD.**

- A, B** Food intake (A) ( $n = 5$ ) and serum panel (B) from WT and *Tfe3* KO mice after 1 month of HFD. Data are presented as mean  $\pm$  SEM. Student's two-tailed *t*-test: leptin ( $n = 3$ )  $*P = 0.0451$ ; adiponectin ( $n = 3$ )  $*P = 0.0192$ ; insulin ( $n = 5$ )  $*P = 0.0287$ ; cholesterol ( $n = 3$ )  $*P = 0.0277$ .
- C** Oxygen consumption ( $V_{O_2}$ ) in WT (black line) ( $n = 5$ ) and *Tfe3* KO mice (red line) ( $n = 5$ ) after 1 month of HFD. Grey areas indicate dark periods (6 PM to 6 AM). Data are presented as mean  $\pm$  SEM.
- D** Bar graph represents average  $V_{O_2}$  values during day and night ( $n = 5$  per group). Data are presented as mean  $\pm$  SEM. Student's two-tailed *t*-test: day  $*P = 0.0122$ ; night  $*P = 0.0174$ .
- E**  $CO_2$  production ( $V_{CO_2}$ ) in WT (black line) ( $n = 5$ ) and *Tfe3* KO mice (red line) ( $n = 5$ ) after 1 month of HFD. Grey areas indicate dark periods (6 PM to 6 AM). Data are presented as mean  $\pm$  SEM.
- F** Bar graph represents average  $V_{CO_2}$  values during day and night ( $n = 5$  per group). Data are presented as mean  $\pm$  SEM. Student's two-tailed *t*-test: day  $**P = 0.0076$ ; night  $*P = 0.0113$ .
- G, H** Glucose (G) and insulin (H) levels at the indicated time point after glucose challenge ( $n = 5$  per group). Data are presented as mean  $\pm$  SEM. ANOVA test followed by *post hoc* Bonferroni test: GTT  $*P = 0.0106$  (15 min),  $**P = 0.0066$  (30 min),  $**P = 0.0029$  (60 min),  $*P = 0.0144$  (120 min); insulin during GTT  $***P = 0.0002$ .
- I** Glucose levels at the indicated time point after insulin challenge ( $n = 5$  per group). Data are presented as mean  $\pm$  SEM. ANOVA test followed by *post hoc* Bonferroni test:  $*P = 0.04$  (30 min);  $*P = 0.03$  (60 min);  $*P = 0.014$  (120 min).
- J** Muscle glucose uptake in control and *Tfe3* KO mice after 1 month of HFD ( $n = 3$  per group). Data are presented as mean  $\pm$  SEM. Student's two-tailed *t*-test: WT PBS versus WT IV glucose  $*P = 0.0294$ ; WT IV glucose versus *Tfe3* KO IV glucose  $*P = 0.0245$ .
- K** *In vivo* lipolysis measured in WT and *Tfe3* KO mice fed a HFD for one month as indicated in the Materials and Methods section ( $n = 3$  per group). Data are presented as mean  $\pm$  SEM. Student's two-tailed *t*-test: FFA  $**P = 0.040$ ; glycerol  $*P = 0.0417$ .

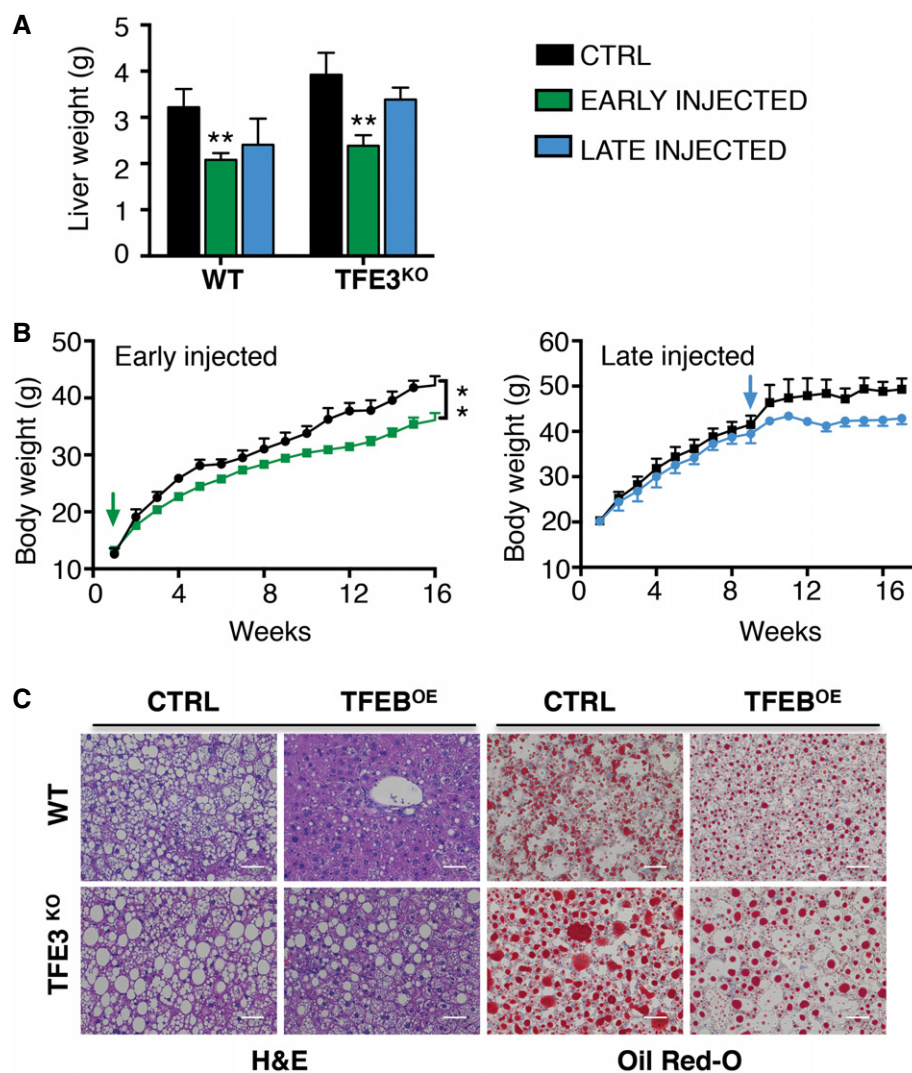

**Figure EV4. TFEB overexpression rescues diet-induced obesity in *Tfe3* KO mice.**

- A Liver weight from WT and *Tfe3* KO mice injected with the HDAd-PEPCK-hTFEB prior to HFD administration (early) ( $n = 13$ ) or 8 weeks into HFD (late) ( $n = 4$ ) and controls ( $n = 6$ ) of the indicated genotypes. Data are presented as mean  $\pm$  SEM. ANOVA test followed by *post hoc* Bonferroni test: WT  $**P = 0.0032$ ; *Tfe3* KO  $**P = 0.0041$ .
- B Body weight in *Tfe3* KO mice injected with an HDAd-PEPCK-TFEB. Arrows indicate the time of injection. Left panel: controls ( $n = 4$ ) and early-injected mice ( $n = 13$ ). Right panel: controls ( $n = 4$ ) and late-injected mice ( $n = 3$ ). Data are presented as mean  $\pm$  SEM. ANOVA test followed by *post hoc* Bonferroni test: early  $**P < 0.01$ .
- C H&E (left panel) and Oil Red O staining (right panel) of liver sections from late-injected mice of the indicated genotypes after 15 weeks of HFD (scale bars: 50  $\mu$ m).
