# Supplementary material for: TFE3 regulates whole‐body energy metabolism in cooperation with TFEB
Source: PubMed Central journal article supplement (PMC5412821; doi:10.15252/emmm.201607204), 2017-03-10

**Figure 4**

**Figure 4C**

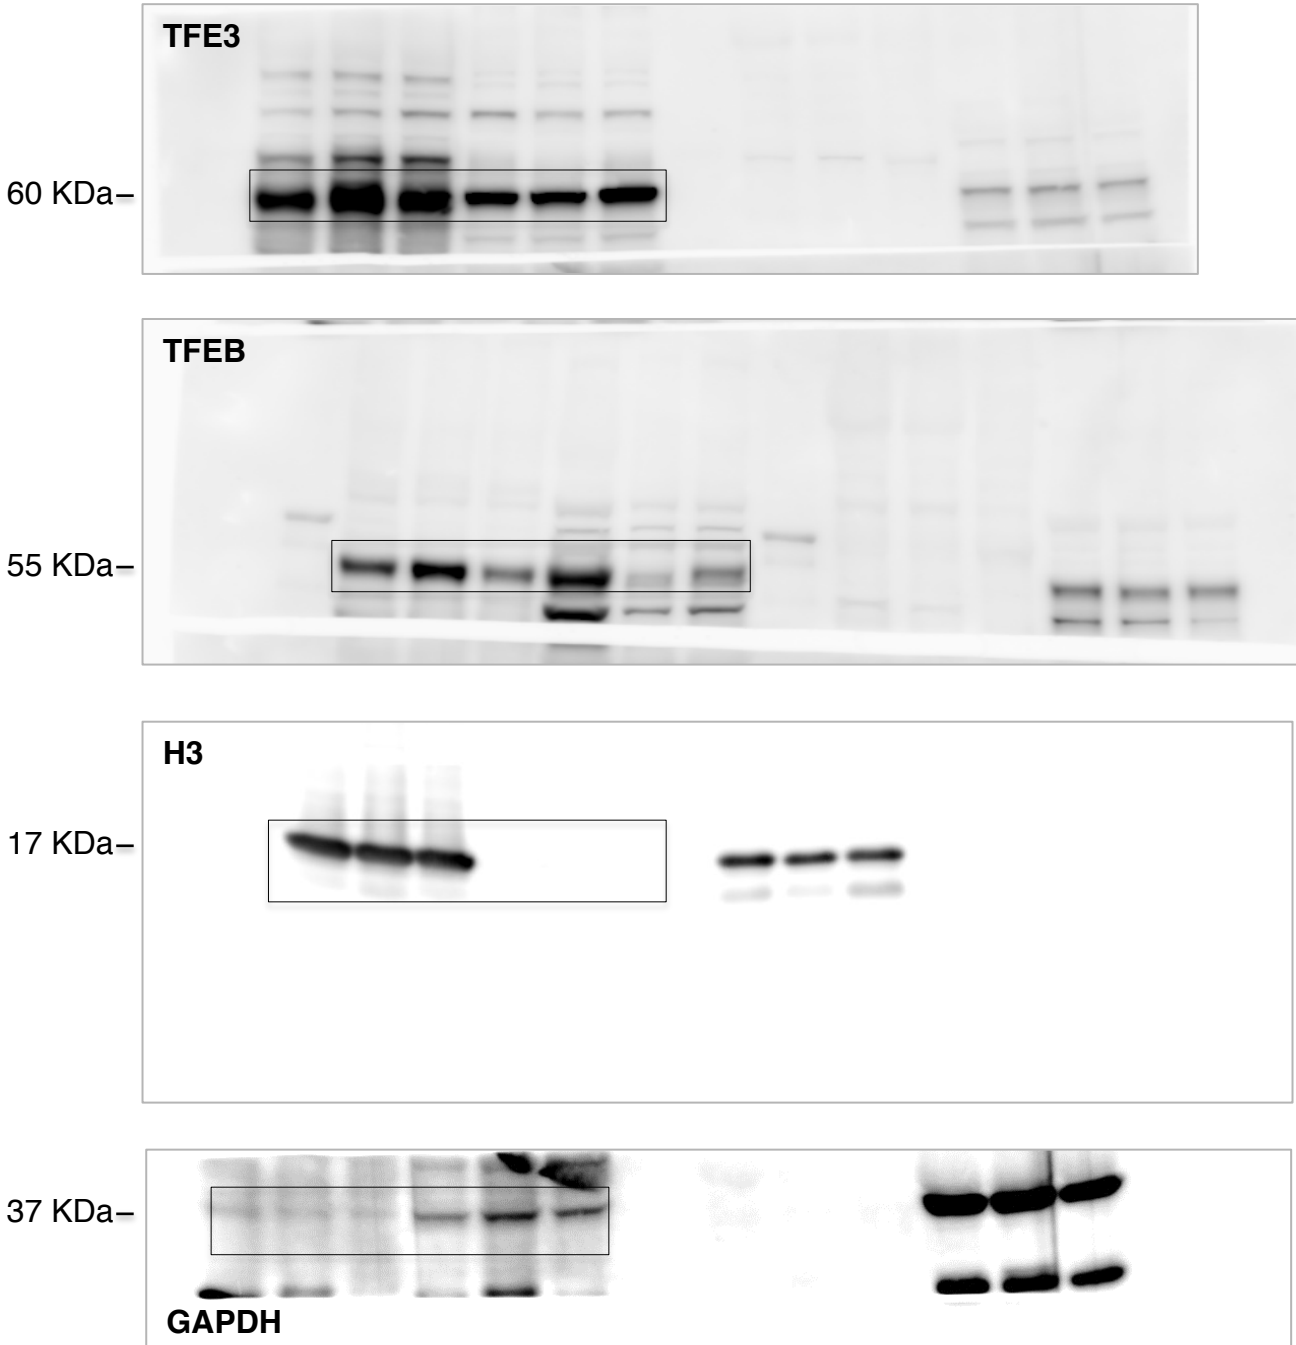

Figure 4

Figure 4D

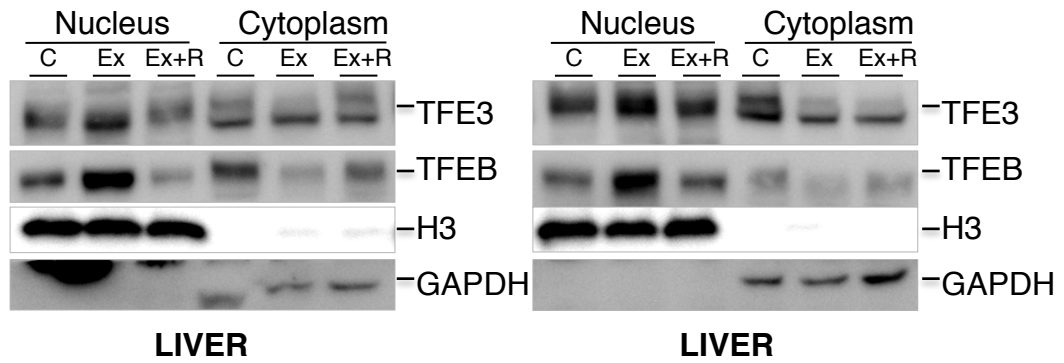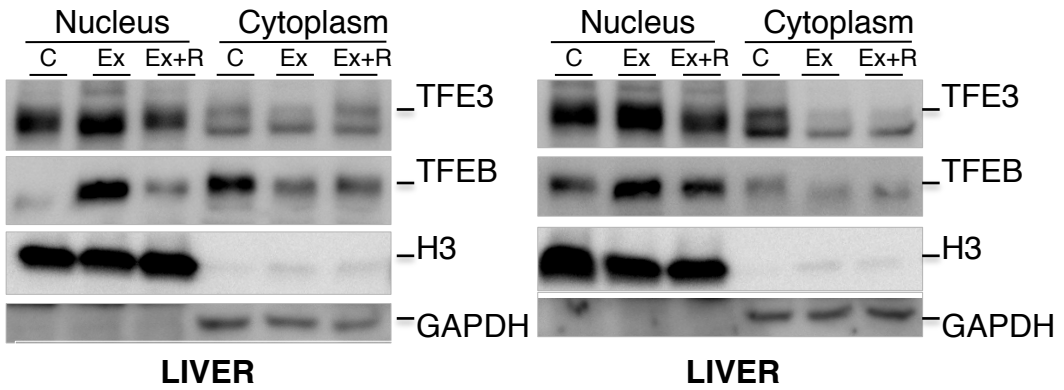

Supplement: EMMM-9-605-s004.pdf [file EMMM-9-605-s004.pdf]
